# Supplementary material
Source: MDPI journal article supplement (https://www.mdpi.com/search?q=nanomaterials-09-01424)
Supplement: s001 [file nanomaterials-09-01424-s001.pdf]

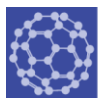

Supporting Information

# Highly Sensitive and Selective Colorimetric Detection of Creatinine Based on Synergistic Effect of PEG/Hg<sup>2+</sup>-AuNPs

Yunxia Xia, Chenxue Zhu, Jie Bian, Yuxi Li, Xunyong Liu\* and Yi Liu\*

School of Chemistry and Materials Science, Ludong University, 264025 Yantai, Shandong Province, China

\* Corresponding authors.

X. Liu, xunyongliu@ldu.edu.cn, Tel./Fax: +86 535 6672176

Y Liu, liuyi200541@ldu.edu.cn

## Supporting Tables and Figures

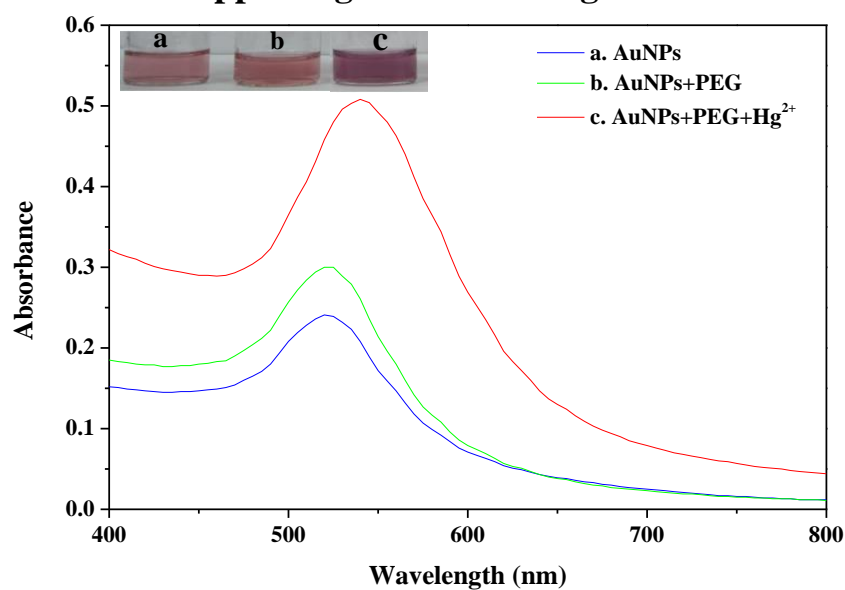

**Figure S1.** The stability of PEG/Hg<sup>2+</sup>-AuNPs probe: Photographs and UV-Vis absorption spectra of above sensor after being placed for 72 hours.

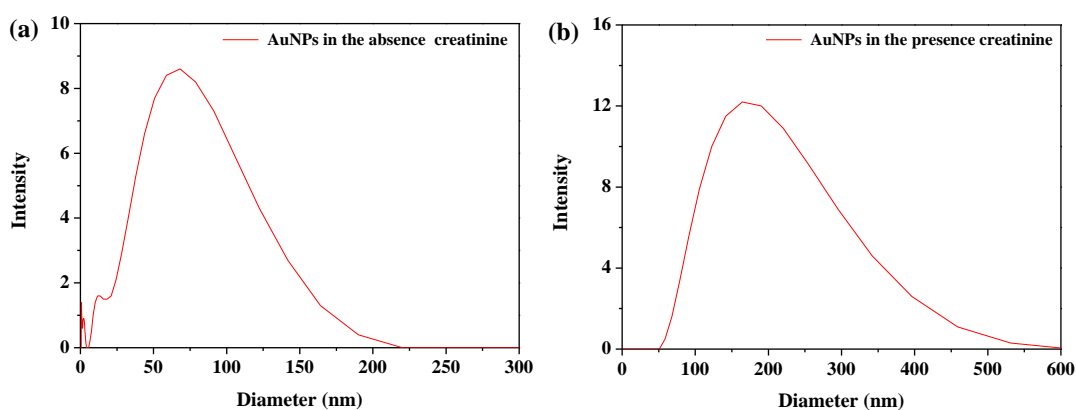

**Figure S2.** DLS diagram of images of PEG/Hg<sup>2+</sup>-AuNPs system in the (a) absence and (b) presence of creatinine.

**Table S1.** The comparison of TEM and DLS data before and after detection.

| Method | Before      | After             |
|--------|-------------|-------------------|
| TEM    | About 11 nm | Aggregation state |
| DLS    | 66 nm       | 180 nm            |

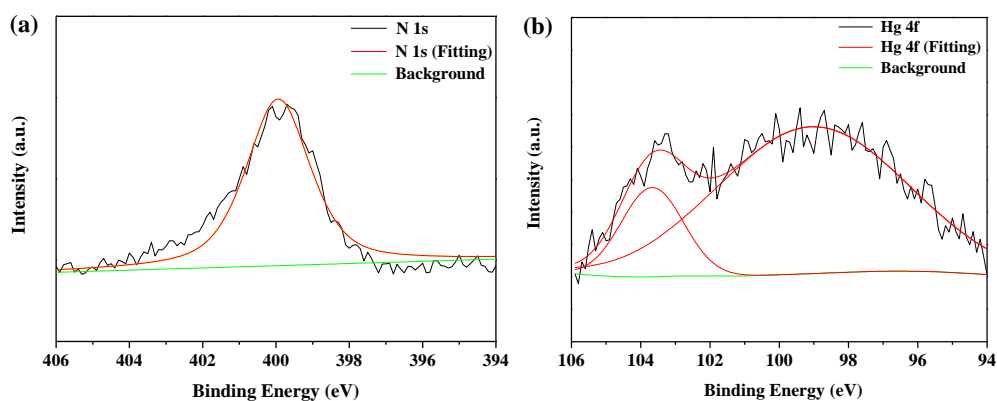

**Figure S3.** XPS spectra of PEG/Hg<sup>2+</sup>-AuNPs in the presence of creatinine with binding energies for (a) N1s, and (b) Hg4f.

**Table S2.** Atomic content of PEG/Hg<sup>2+</sup>-AuNPs before and after detecting creatinine.

| Atomic species | Before (%) | After (%) |
|----------------|------------|-----------|
| N 1s           | 0          | 1.3       |
| Hg 4f          | 0          | 0.26      |

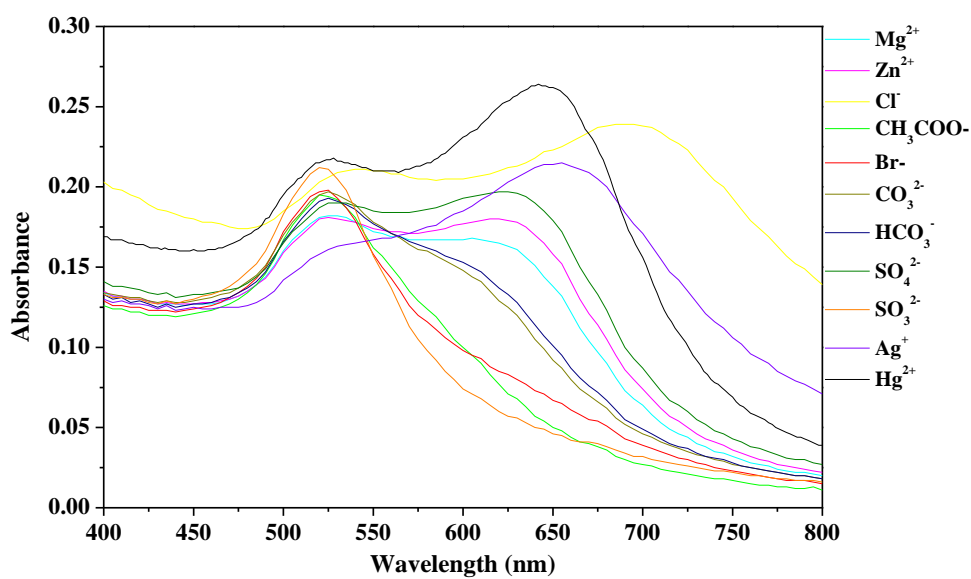

**Figure S4.** The role of Hg<sup>2+</sup>: Absorption spectra of samples using different kind to replace Hg<sup>2+</sup>.

**Table S3.** The comparison of this PEG/Hg<sup>2+</sup>-AuNPs with some reported methods.

| Technique                                                                       | LOD      | Reference |
|---------------------------------------------------------------------------------|----------|-----------|
| Jaffé-based procedure                                                           | 0.72 mM  | [1]       |
| Composite imprinted polymer membranes colorimetric test-systems                 | 0.25 mM  | [2]       |
| Gold nanoparticles-based detection after solid phase extraction                 | 0.121 mM | [3]       |
| Gold nanoparticles-based probe                                                  | 80 μM    | [4]       |
| Liquid chromatography–isotope dilution mass spectrometry (LC–IDMS) method       | 17.6 μM  | [5]       |
| A conductometric creatinine biosensor                                           | 2 μM     | [6]       |
| Improved HPLC method for creatinine                                             | 1.15 μM  | [7]       |
| Glutathione (GSH)-protected gold nanoparticles                                  | 1.21 μM  | [8]       |
| Spectrophotometric assay of creatinine                                          | 0.487 μM | [9]       |
| An enzymeless electroanalytical method                                          | 380 nM   | [10]      |
| A disposable non-enzymatic electrochemical creatinine sensor                    | 74.6 nM  | [11]      |
| Chemiluminescence of creatinine/H <sub>2</sub> O <sub>2</sub> /Co <sup>2+</sup> | 72 nM    | [12]      |
| This PEG/Hg <sup>2+</sup> - AuNPs sensor                                        | 9.68 nM  | This work |

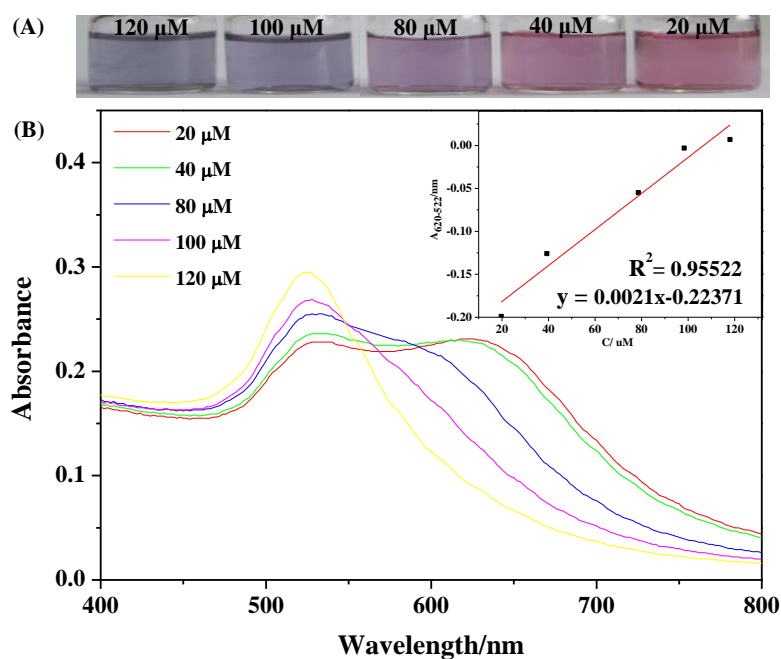

**Figure S5.** Sensitivity of AuNPs probe (0.798 nM) in urine simulating fluid sample: (A) Photographs and (B) absorption spectra of serum samples containing different concentration of creatinine (from 20 to 120 μM), inset: (C) linear relationship between creatinine concentration and absorbance response difference in urine simulating fluid sample.

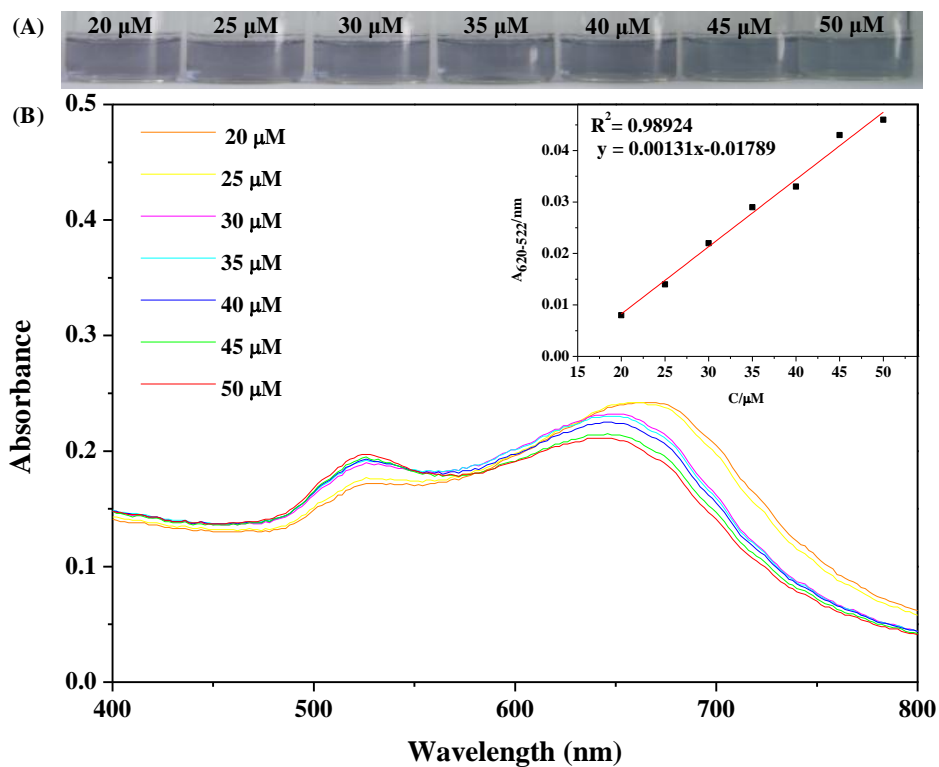

**Figure S6.** Practicability of AuNPs probe (0.798 nM) in real bovine serum samples: (A) Photographs and (B) absorption spectra of real bovine serum sample containing different concentration of creatinine (from 20 to 50 μM), inset: linear relationship between creatinine concentration and absorbance response in bovine sample.

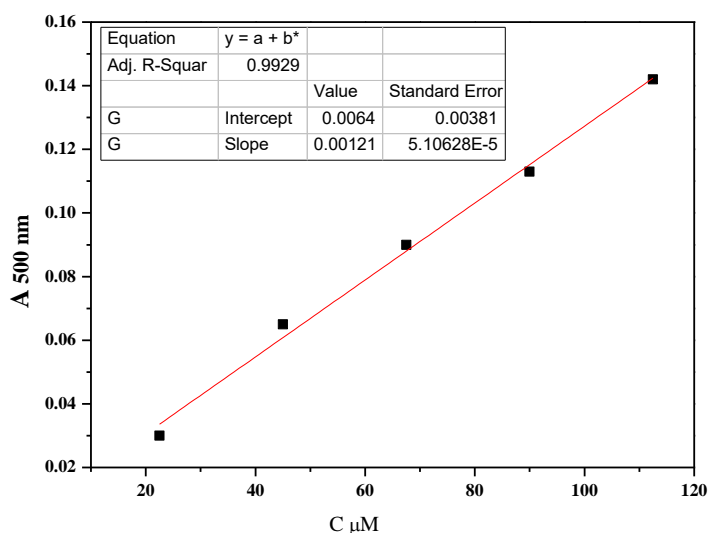

**Figure S7.** Linear relationship of creatinine content with A<sub>500 nm</sub> values by Jaffe's method for bovine serum sample.

**Table S4.** Determination of creatinine by proposed sensor and Jaffe' reaction.

| Sample   | Added<br>( $\mu\text{M}$ ) | Proposed Method |              | Jaffe's Reaction |              |
|----------|----------------------------|-----------------|--------------|------------------|--------------|
|          |                            | Found           | Recovery (%) | Found            | Recovery (%) |
| <b>1</b> | 40                         | 40.13           | 100.32       | 40.17            | 100.42       |

## References

1. Campins Falcó, P.; Tortajada Genaro, L.A.; Meseger Lloret, S.; Blasco Gomez, F.; Sevillano Cabeza, A.; Molins Legua, C. Creatinine determination in urine samples by batchwise kinetic procedure and flow injection analysis using the Jaffé reaction: Chemometric study. *Talanta* **2001**, *55*, 1079-1089.
2. Sergeyeva, T.A.; Gorbach, L.A.; Piletska, E.V.; Piletsky, S.A.; Brovko, O.O.; Honcharova, L.A.; Lutsyk, O.D.; Sergeeva, L.M.; Zinchenko, O.A.; El'skaya, A.V. Colorimetric test-systems for creatinine detection based on composite molecularly imprinted polymer membranes. *Anal. Chim. Acta* **2013**, *770*, 161-168.
3. Sittiwong, J.; Unob, F. Detection of urinary creatinine using gold nanoparticles after solid phase extraction. *Spectrochim Acta A Mol Biomol Spectrosc* **2015**, *138*, 381-386.
4. He, Y.; Zhang, X.; Yu, H. Gold nanoparticles-based colorimetric and visual creatinine assay. *Microchim. Acta* **2015**, *182*, 2037-2043.
5. Harlan, R.; Clarke, W.; Di Bussolo, J.M.; Kozak, M.; Straseski, J.; Meany, D.L. An automated turbulent flow liquid chromatography-isotope dilution mass spectrometry (LC-IDMS) method for quantitation of serum creatinine. *Clin. Chim. Acta* **2010**, *411*, 1728-1734.
6. Braiek, M.; Djebbi, M.A.; Chateaux, J.-F.; Bonhomme, A.; Vargiolu, R.; Bessueille, F.; Jaffrezic-Renault, N. A conductometric creatinine biosensor prepared through contact printing of polyvinyl alcohol/polyethyleneimine based enzymatic membrane. *Microelectron. Eng.* **2018**, *187-188*, 43-49.
7. George, S.K.; Dipu, M.T.; Mehra, U.R.; Singh, P.; Verma, A.K.; Ramgaokar, J.S. Improved hplc method for the simultaneous determination of allantoin, uric acid and creatinine in cattle urine. *J Chromatogr B Analyt Technol Biomed Life Sci* **2006**, *832*, 134-137.
8. Huang, X.; Li, Y.; Pan, J.; Lu, F.; Chen, Y.; Gao, W. Glutathione-protected hierarchical colorimetric response of gold nanoparticles: A simple assay for creatinine rapid detection by resonance light scattering technique. *Plasmonics* **2015**, *10*, 1107-1114.
9. Krishnegowda, A.; Padmarajaiah, N.; Anantharaman, S.; Honnur, K. Spectrophotometric assay of creatinine in human serum sample. *Arabian J. Chem.* **2017**, *10*, S2018-S2024.
10. de Araújo, W.R.; Salles, M.O.; Paixão, T.R.L.C. Development of an enzymeless electroanalytical method for the indirect detection of creatinine in urine samples. *Sens. Actuators, B* **2012**, *173*, 847-851.
11. Raveendran, J.; P.E, R.; T, R.; G. Nair, B.; Satheesh Babu, T.G. Fabrication of a disposable non-enzymatic electrochemical creatinine sensor. *Sens. Actuators, B* **2017**, *243*, 589-595.
12. Hanif, S.; John, P.; Gao, W.; Saqib, M.; Qi, L.; Xu, G. Chemiluminescence of creatinine/ $\text{H}_2\text{O}_2/\text{Co}(2+)$  and its application for selective creatinine detection. *Biosens. Bioelectron.* **2016**, *75*, 347-351.
